# Supplementary material
Source: PubMed Central journal article supplement (PMC8995824)
Supplement: gutjnl-2020-322595supp001.pdf [file gutjnl-2020-322595supp001.pdf]

**Supplementary Table 1. Clinical and pathologic comparison of ARX, PDX1 and ALT status in 137 non-syndromic, primary NF-PanNETs from Utrecht/Amsterdam University and ARC-Net Research Center.**

| Patient or Tumor Characteristics           | Total, n = 137   | ARX-positive, n = 107 (78%) | ARX-negative, n = 30 (22%) | <i>p</i> | PDX1-positive, n = 76 (55%) | PDX1-negative, n = 61 (45%) | <i>p</i> | ALT-positive, n = 48 (35%) | ALT-negative, n = 89 (65%) | <i>p</i> |
|--------------------------------------------|------------------|-----------------------------|----------------------------|----------|-----------------------------|-----------------------------|----------|----------------------------|----------------------------|----------|
| <b>Gender</b>                              |                  |                             |                            |          |                             |                             |          |                            |                            |          |
| Female                                     | 69 (50%)         | 49 (46%)                    | 20 (67%)                   | 0.062    | 39 (51%)                    | 30 (49%)                    | 0.864    | 20 (42%)                   | 49 (55%)                   | 0.154    |
| Male                                       | 68 (50%)         | 58 (54%)                    | 10 (33%)                   |          | 37 (49%)                    | 31 (51%)                    |          | 28 (58%)                   | 40 (45%)                   |          |
| Mean age (range), years                    | 57.2 (22 - 77)   | 57.1 (23 - 77)              | 57.3 (22 - 74)             | 0.857    | 56.4 (23 - 75)              | 58.1 (22 - 77)              | 0.227    | 58.8 (40 - 77)             | 56.2 (22 - 75)             | 0.377    |
| Mean tumor size (range), cm                | 3.7 (0.6 - 18.0) | 3.9 (0.7 - 18.0)            | 2.9 (0.6 - 8.0)            | 0.153    | 3.3 (0.6 - 18.0)            | 4.1 (0.7 - 12.0)            | 0.072    | 5.3 (1.5 - 18.0)           | 2.8 (0.6 - 10.0)           | < 0.001  |
| <b>Location</b>                            |                  |                             |                            |          |                             |                             |          |                            |                            |          |
| Head, neck and uncinate                    | 60 (44%)         | 41 (38%)                    | 19 (63%)                   | 0.051    | 38 (50%)                    | 22 (36%)                    | 0.203    | 18 (38%)                   | 42 (47%)                   | 0.331    |
| Body and tail                              | 75 (55%)         | 64 (60%)                    | 11 (37%)                   |          | 37 (49%)                    | 38 (62%)                    |          | 30 (62%)                   | 45 (51%)                   |          |
| Diffuse                                    | 2 (1%)           | 2 (2%)                      | 0 (0%)                     |          | 1 (1%)                      | 1 (2%)                      |          | 0 (0%)                     | 2 (2%)                     |          |
| <b>WHO grade</b>                           |                  |                             |                            |          |                             |                             |          |                            |                            |          |
| Low (G1)                                   | 90 (66%)         | 67 (63%)                    | 23 (77%)                   | 0.117    | 54 (71%)                    | 36 (59%)                    | 0.118    | 17 (35%)                   | 73 (82%)                   | < 0.001  |
| Intermediate (G2)                          | 45 (33%)         | 39 (36%)                    | 6 (20%)                    |          | 22 (29%)                    | 23 (38%)                    |          | 31 (65%)                   | 14 (16%)                   |          |
| High (G3)                                  | 2 (1%)           | 1 (1%)                      | 1 (3%)                     |          | 0 (0%)                      | 2 (3%)                      |          | 0 (0%)                     | 2 (2%)                     |          |
| <b>Primary tumor (pT) stage</b>            |                  |                             |                            |          |                             |                             |          |                            |                            |          |
| T1                                         | 33 (24%)         | 24 (22%)                    | 9 (30%)                    | 0.555    | 20 (26%)                    | 13 (21%)                    | 0.366    | 4 (8%)                     | 29 (33%)                   | < 0.001  |
| T2                                         | 56 (41%)         | 43 (40%)                    | 13 (43%)                   |          | 34 (45%)                    | 22 (36%)                    |          | 15 (31%)                   | 41 (46%)                   |          |
| T3                                         | 42 (31%)         | 34 (32%)                    | 8 (27%)                    |          | 20 (26%)                    | 22 (36%)                    |          | 23 (48%)                   | 19 (21%)                   |          |
| T4                                         | 6 (4%)           | 6 (6%)                      | 0 (0%)                     |          | 2 (3%)                      | 4 (7%)                      |          | 6 (13%)                    | 0 (0%)                     |          |
| <b>Regional node (pN) stage</b>            | <i>n = 114</i>   | <i>n = 87</i>               | <i>n = 27</i>              |          | <i>n = 66</i>               | <i>n = 48</i>               |          | <i>n = 44</i>              | <i>n = 70</i>              |          |
| N0                                         | 71 (62%)         | 57 (66%)                    | 14 (52%)                   | 0.256    | 40 (61%)                    | 31 (65%)                    | 0.700    | 22 (50%)                   | 49 (70%)                   | 0.047    |
| N1                                         | 43 (38%)         | 30 (34%)                    | 13 (48%)                   |          | 26 (39%)                    | 17 (35%)                    |          | 22 (50%)                   | 21 (30%)                   |          |
| <b>Metachronous metastases/recurrences</b> |                  |                             |                            |          |                             |                             |          |                            |                            |          |
| Absent                                     | 87 (64%)         | 64 (60%)                    | 23 (77%)                   | 0.132    | 50 (66%)                    | 37 (61%)                    | 0.594    | 17 (35%)                   | 70 (79%)                   | < 0.001  |
| Present                                    | 50 (36%)         | 43 (40%)                    | 7 (23%)                    |          | 26 (34%)                    | 24 (39%)                    |          | 31 (65%)                   | 19 (21%)                   |          |
| <b>ARX Expression</b>                      |                  |                             |                            |          |                             |                             |          |                            |                            |          |
| Negative                                   | 30 (22%)         |                             |                            |          | 22 (29%)                    | 8 (13%)                     | 0.037    | 3 (6%)                     | 27 (30%)                   | 0.001    |
| Positive                                   | 107 (78%)        |                             |                            |          | 54 (71%)                    | 53 (87%)                    |          | 45 (94%)                   | 62 (70%)                   |          |
| <b>PDX1 Expression</b>                     |                  |                             |                            |          |                             |                             |          |                            |                            |          |
| Negative                                   | 61 (44%)         | 53 (50%)                    | 8 (27%)                    | 0.037    |                             |                             |          | 27 (56%)                   | 34 (38%)                   | 0.049    |
| Positive                                   | 76 (56%)         | 54 (50%)                    | 22 (73%)                   |          |                             |                             |          | 21 (44%)                   | 55 (62%)                   |          |
| <b>ATRX/DAXX Expression</b>                |                  |                             |                            |          |                             |                             |          |                            |                            |          |
| Preserved                                  | 97 (71%)         | 69 (64%)                    | 28 (93%)                   | 0.001    | 56 (74%)                    | 41 (67%)                    | 0.453    | 14 (29%)                   | 83 (93%)                   | < 0.001  |
| Loss                                       | 40 (29%)         | 38 (36%)                    | 2 (7%)                     |          | 20 (26%)                    | 20 (33%)                    |          | 34 (71%)                   | 6 (7%)                     |          |
| <b>ALT status</b>                          |                  |                             |                            |          |                             |                             |          |                            |                            |          |
| Negative                                   | 89 (65%)         | 62 (58%)                    | 27 (90%)                   | 0.001    | 55 (72%)                    | 34 (56%)                    | 0.049    |                            |                            |          |
| Positive                                   | 48 (35%)         | 45 (42%)                    | 3 (10%)                    |          | 21 (28%)                    | 27 (44%)                    |          |                            |                            |          |

Abbreviations: ALT, alternative lengthening of telomeres; NF-PanNET, non-functional pancreatic neuroendocrine tumor; WHO, World Health Organization

**Supplementary Table 2. Clinical and pathologic comparison of ARX, PDX1 and ALT status in 168 non-syndromic, primary NF-PanNETs from Asan Medical Center.**

| Patient or Tumor Characteristics           | Total, n = 168   | ARX-positive, n = 132 (79%) | ARX-negative, n = 36 (21%) | <i>P</i> | PDX1-positive, n = 81 (48%) | PDX1-negative, n = 87 (52%) | <i>P</i> | ALT-positive, n = 43 (26%) | ALT-negative, n = 125 (74%) | <i>P</i> |
|--------------------------------------------|------------------|-----------------------------|----------------------------|----------|-----------------------------|-----------------------------|----------|----------------------------|-----------------------------|----------|
| <b>Gender</b>                              |                  |                             |                            |          |                             |                             |          |                            |                             |          |
| Female                                     | 87 (52%)         | 69 (52%)                    | 18 (50%)                   | 0.852    | 50 (62%)                    | 37 (43%)                    | 0.014    | 17 (40%)                   | 70 (56%)                    | 0.077    |
| Male                                       | 81 (48%)         | 63 (48%)                    | 18 (50%)                   |          | 31 (38%)                    | 50 (57%)                    |          | 26 (60%)                   | 55 (44%)                    |          |
| Mean age (range), years                    | 53.3 (20 - 77)   | 52.8 (26 - 77)              | 54.9 (20 - 77)             | 0.298    | 53.1 (20 - 77)              | 53.5 (29 - 77)              | 0.910    | 52.7 (26 - 72)             | 53.5 (20 - 77)              | 0.815    |
| Mean tumor size (range), cm                | 3.1 (0.7 - 15.5) | 3.2 (0.7 - 15.5)            | 2.7 (0.8 - 9.0)            | 0.193    | 2.9 (0.7 - 9.0)             | 3.4 (0.7 - 15.5)            | 0.577    | 4.5 (0.7 - 15.5)           | 2.7 (0.7 - 9.0)             | < 0.001  |
| <b>Location</b>                            |                  |                             |                            |          |                             |                             |          |                            |                             |          |
| Head, neck and uncinat                     | 76 (45%)         | 59 (45%)                    | 17 (47%)                   | 0.883    | 42 (52%)                    | 34 (39%)                    | 0.088    | 14 (33%)                   | 62 (50%)                    | 0.035    |
| Body and tail                              | 91 (54%)         | 72 (54%)                    | 19 (53%)                   |          | 38 (47%)                    | 53 (61%)                    |          | 28 (65%)                   | 63 (50%)                    |          |
| Diffuse                                    | 1 (1%)           | 1 (1%)                      | 0 (0%)                     |          | 1 (1%)                      | 0 (0%)                      |          | 1 (2%)                     | 0 (0%)                      |          |
| <b>WHO grade</b>                           |                  |                             |                            |          |                             |                             |          |                            |                             |          |
| Low (G1)                                   | 114 (68%)        | 89 (67%)                    | 25 (69%)                   | 0.139    | 58 (72%)                    | 56 (64%)                    | 0.234    | 20 (46%)                   | 94 (75%)                    | < 0.001  |
| Intermediate (G2)                          | 51 (30%)         | 42 (32%)                    | 9 (25%)                    |          | 23 (28%)                    | 28 (32%)                    |          | 23 (54%)                   | 28 (23%)                    |          |
| High (G3)                                  | 3 (2%)           | 1 (1%)                      | 2 (6%)                     |          | 0 (0%)                      | 3 (4%)                      |          | 0 (0%)                     | 3 (2%)                      |          |
| <b>Primary tumor (pT) stage</b>            |                  |                             |                            |          |                             |                             |          |                            |                             |          |
| T1                                         | 63 (37%)         | 46 (35%)                    | 17 (47%)                   | 0.538    | 29 (36%)                    | 34 (39%)                    | 0.582    | 6 (14%)                    | 57 (45%)                    | < 0.001  |
| T2                                         | 61 (36%)         | 49 (37%)                    | 12 (34%)                   |          | 33 (41%)                    | 28 (32%)                    |          | 19 (44%)                   | 42 (34%)                    |          |
| T3                                         | 43 (26%)         | 36 (27%)                    | 7 (19%)                    |          | 19 (23%)                    | 24 (28%)                    |          | 17 (40%)                   | 26 (21%)                    |          |
| T4                                         | 1 (1%)           | 1 (1%)                      | 0 (0%)                     |          | 0 (0%)                      | 1 (1%)                      |          | 1 (2%)                     | 0 (0%)                      |          |
| <b>Regional node (pN) stage</b>            |                  |                             |                            |          |                             |                             |          |                            |                             |          |
| N0                                         | 144 (86%)        | 113 (86%)                   | 31 (86%)                   | 1.000    | 67 (83%)                    | 77 (89%)                    | 0.378    | 31 (72%)                   | 113 (90%)                   | 0.005    |
| N1                                         | 24 (14%)         | 19 (14%)                    | 5 (14%)                    |          | 14 (17%)                    | 10 (11%)                    |          | 12 (28%)                   | 12 (10%)                    |          |
| <b>Metachronous metastases/recurrences</b> |                  |                             |                            |          |                             |                             |          |                            |                             |          |
| Absent                                     | 135 (80%)        | 105 (80%)                   | 30 (83%)                   | 0.813    | 70 (86%)                    | 65 (75%)                    | 0.079    | 25 (58%)                   | 110 (88%)                   | < 0.001  |
| Present                                    | 33 (20%)         | 27 (20%)                    | 6 (17%)                    |          | 11 (14%)                    | 22 (25%)                    |          | 18 (42%)                   | 15 (12%)                    |          |
| <b>ARX Expression</b>                      |                  |                             |                            |          |                             |                             |          |                            |                             |          |
| Negative                                   |                  |                             |                            |          | 27 (33%)                    | 9 (10%)                     | < 0.001  | 2 (5%)                     | 34 (27%)                    | 0.001    |
| Positive                                   |                  |                             |                            |          | 54 (67%)                    | 78 (90%)                    |          | 41 (95%)                   | 91 (73%)                    |          |
| <b>PDX1 Expression</b>                     |                  |                             |                            |          |                             |                             |          |                            |                             |          |
| Negative                                   | 87 (52%)         | 78 (59%)                    | 9 (25%)                    | < 0.001  |                             |                             |          | 32 (74%)                   | 55 (44%)                    | 0.001    |
| Positive                                   | 81 (48%)         | 54 (41%)                    | 27 (75%)                   |          |                             |                             |          | 11 (26%)                   | 70 (56%)                    |          |
| <b>ATRX/DAXX Expression</b>                |                  |                             |                            |          |                             |                             |          |                            |                             |          |
| Preserved                                  | 130 (77%)        | 97 (74%)                    | 33 (92%)                   | 0.024    | 73 (90%)                    | 57 (66%)                    | < 0.001  | 6 (14%)                    | 124 (99%)                   | < 0.001  |
| Loss                                       | 38 (23%)         | 35 (26%)                    | 3 (8%)                     |          | 8 (10%)                     | 30 (34%)                    |          | 37 (86%)                   | 1 (1%)                      |          |
| <b>ALT status</b>                          |                  |                             |                            |          |                             |                             |          |                            |                             |          |
| Negative                                   | 125 (74%)        | 91 (69%)                    | 34 (94%)                   | 0.001    | 70 (86%)                    | 55 (63%)                    | 0.001    |                            |                             |          |
| Positive                                   | 43 (26%)         | 41 (31%)                    | 2 (6%)                     |          | 11 (14%)                    | 32 (37%)                    |          |                            |                             |          |

Abbreviations: ALT, alternative lengthening of telomeres; NF-PanNET, non-functional pancreatic neuroendocrine tumor; WHO, World Health Organization

**Supplementary Table 3. Clinical and pathologic comparison of ARX, PDX1 and ALT status in 256 non-syndromic, primary NF-PanNETs from Barnes-Jewish Hospital and UPMC.**

| Patient or Tumor Characteristics    | Total, n = 256   | ARX-positive, n = 167 (65%) | ARX-negative, n = 89 (35%) | <i>P</i> | PDX1-positive, n = 82 (32%) | PDX1-negative, n = 174 (68%) | <i>P</i> | ALT-positive, n = 69 (27%) | ALT-negative, n = 187 (73%) | <i>P</i> |
|-------------------------------------|------------------|-----------------------------|----------------------------|----------|-----------------------------|------------------------------|----------|----------------------------|-----------------------------|----------|
| Gender                              |                  |                             |                            |          |                             |                              |          |                            |                             |          |
| Female                              | 119 (46%)        | 73 (44%)                    | 46 (52%)                   | 0.238    | 42 (51%)                    | 77 (44%)                     | 0.347    | 22 (32%)                   | 97 (52%)                    | 0.005    |
| Male                                | 137 (54%)        | 94 (56%)                    | 43 (48%)                   |          | 40 (49%)                    | 97 (56%)                     |          | 47 (68%)                   | 90 (48%)                    |          |
| Mean age (range), years             | 59.1 (22 - 93)   | 59.0 (26 - 83)              | 59.3 (22 - 93)             | 0.973    | 58.9 (22 - 93)              | 59.2 (26 - 85)               | 0.746    | 61.1 (40 - 93)             | 58.4 (22 - 85)              | 0.290    |
| Mean tumor size (range), cm         | 3.2 (0.6 - 14.0) | 3.3 (0.7 - 14.0)            | 3.0 (0.6 - 10.0)           | 0.196    | 2.9 (0.6 - 9.5)             | 3.3 (0.7 - 14.0)             | 0.138    | 4.5 (1.2 - 14.0)           | 2.7 (0.6 - 9.5)             | < 0.001  |
| Location                            |                  |                             |                            |          |                             |                              |          |                            |                             |          |
| Head, neck and uncinat              | 97 (38%)         | 53 (32%)                    | 44 (49%)                   | 0.007    | 37 (45%)                    | 60 (34%)                     | 0.129    | 29 (42%)                   | 68 (36%)                    | 0.468    |
| Body and tail                       | 159 (62%)        | 114 (68%)                   | 45 (51%)                   |          | 45 (55%)                    | 114 (66%)                    |          | 40 (58%)                   | 119 (64%)                   |          |
| Diffuse                             | 0 (0%)           | 0 (0%)                      | 0 (0%)                     |          | 0 (0%)                      | 0 (0%)                       |          | 0 (0%)                     | 0 (0%)                      |          |
| WHO grade                           |                  |                             |                            |          |                             |                              |          |                            |                             |          |
| Low (G1)                            | 158 (62%)        | 100 (60%)                   | 58 (65%)                   | 0.277    | 51 (62%)                    | 107 (62%)                    | 1.000    | 21 (30%)                   | 137 (73%)                   | < 0.001  |
| Intermediate (G2)                   | 93 (36%)         | 65 (39%)                    | 28 (32%)                   |          | 30 (37%)                    | 63 (36%)                     |          | 45 (65%)                   | 48 (26%)                    |          |
| High (G3)                           | 5 (2%)           | 2 (1%)                      | 3 (2%)                     |          | 1 (1%)                      | 4 (2%)                       |          | 3 (4%)                     | 2 (1%)                      |          |
| Primary tumor (pT) stage            |                  |                             |                            |          |                             |                              |          |                            |                             |          |
| T1                                  | 83 (32%)         | 50 (30%)                    | 33 (37%)                   | 0.478    | 30 (36%)                    | 53 (31%)                     | 0.417    | 3 (4%)                     | 80 (43%)                    | < 0.001  |
| T2                                  | 111 (43%)        | 76 (45%)                    | 35 (39%)                   |          | 36 (44%)                    | 75 (43%)                     |          | 35 (51%)                   | 76 (40%)                    |          |
| T3                                  | 62 (24%)         | 41 (25%)                    | 21 (24%)                   |          | 16 (20%)                    | 46 (26%)                     |          | 31 (45%)                   | 31 (17%)                    |          |
| T4                                  | 0 (0%)           | 0 (0%)                      | 0 (0%)                     |          | 0 (0%)                      | 0 (0%)                       |          | 0 (0%)                     | 0 (0%)                      |          |
| Regional node (pN) stage            | <i>n</i> = 220   | <i>n</i> = 149              | <i>n</i> = 71              |          | <i>n</i> = 66               | <i>n</i> = 154               |          | <i>n</i> = 68              | <i>n</i> = 152              |          |
| N0                                  | 147 (67%)        | 107 (72%)                   | 40 (56%)                   | 0.032    | 39 (59%)                    | 108 (70%)                    | 0.120    | 32 (47%)                   | 115 (76%)                   | < 0.001  |
| N1                                  | 73 (33%)         | 42 (28%)                    | 31 (44%)                   |          | 27 (41%)                    | 46 (30%)                     |          | 36 (53%)                   | 37 (24%)                    |          |
| Metachronous metastases/recurrences |                  |                             |                            |          |                             |                              |          |                            |                             |          |
| Absent                              | 201 (78%)        | 129 (77%)                   | 72 (81%)                   | 0.527    | 69 (84%)                    | 132 (76%)                    | 0.145    | 29 (42%)                   | 172 (92%)                   | < 0.001  |
| Present                             | 55 (22%)         | 38 (23%)                    | 17 (19%)                   |          | 13 (16%)                    | 42 (24%)                     |          | 40 (58%)                   | 15 (8%)                     |          |
| ARX Expression                      |                  |                             |                            |          |                             |                              |          |                            |                             |          |
| Negative                            |                  |                             |                            |          | 64 (78%)                    | 25 (14%)                     | < 0.001  | 13 (19%)                   | 76 (41%)                    | 0.001    |
| Positive                            |                  |                             |                            |          | 18 (22%)                    | 149 (86%)                    |          | 56 (81%)                   | 111 (59%)                   |          |
| PDX1 Expression                     |                  |                             |                            |          |                             |                              |          |                            |                             |          |
| Negative                            | 174 (68%)        | 149 (89%)                   | 25 (28%)                   | < 0.001  |                             |                              |          | 56 (81%)                   | 118 (63%)                   | 0.006    |
| Positive                            | 82 (32%)         | 18 (11%)                    | 64 (72%)                   |          |                             |                              |          | 13 (19%)                   | 69 (37%)                    |          |
| ATRX/DAXX Expression                |                  |                             |                            |          |                             |                              |          |                            |                             |          |
| Preserved                           | 192 (75%)        | 117 (70%)                   | 75 (84%)                   | 0.015    | 68 (83%)                    | 124 (71%)                    | 0.046    | 8 (12%)                    | 184 (98%)                   | < 0.001  |
| Loss                                | 64 (25%)         | 50 (30%)                    | 14 (16%)                   |          | 14 (17%)                    | 50 (29%)                     |          | 61 (88%)                   | 3 (2%)                      |          |
| ALT status                          |                  |                             |                            |          |                             |                              |          |                            |                             |          |
| Negative                            | 187 (73%)        | 111 (66%)                   | 76 (85%)                   | 0.001    | 69 (84%)                    | 118 (68%)                    | 0.006    |                            |                             |          |
| Positive                            | 69 (27%)         | 56 (34%)                    | 13 (15%)                   |          | 13 (16%)                    | 56 (32%)                     |          |                            |                             |          |

Abbreviations: ALT, alternative lengthening of telomeres; NF-PanNET, non-functional pancreatic neuroendocrine tumor; WHO, World Health Organization; UPMC, University of Pittsburgh Medical Center; WHO, World Health Organization

**Supplementary Table 4. Clinical and pathologic comparison of 561 primary NF-PanNETs based on the status of ARX and PDX1.**

| Patient or Tumor Characteristics    | ARX-positive/PDX1-negative,<br>n = 280 (50%) | ARX-negative/PDX1-positive,<br>n = 113 (20%) | ARX-positive/PDX1-positive<br>(DP), n = 126 (22%) | ARX-negative/PDX1-negative<br>(DN), n = 42 (8%) | P       |
|-------------------------------------|----------------------------------------------|----------------------------------------------|---------------------------------------------------|-------------------------------------------------|---------|
| Gender                              |                                              |                                              |                                                   |                                                 |         |
| Female                              | 120 (43%)                                    | 60 (53%)                                     | 71 (56%)                                          | 24 (57%)                                        | 0.031   |
| Male                                | 160 (57%)                                    | 53 (47%)                                     | 55 (44%)                                          | 18 (43%)                                        |         |
| Mean age (range), years             | 57.5 (26 - 83)                               | 58.2 (20 - 93)                               | 54.2 (23 - 76)                                    | 56.9 (22 - 85)                                  | 0.050   |
| Mean tumor size (range), cm         | 3.5 (0.7 - 15.5)                             | 2.8 (0.6 - 9.5)                              | 3.2 (0.7 - 18.0)                                  | 3.2 (0.7 - 10.0)                                | 0.049   |
| Location                            |                                              |                                              |                                                   |                                                 |         |
| Head, neck and uncinata             | 91 (33%)                                     | 55 (49%)                                     | 62 (49%)                                          | 25 (60%)                                        | < 0.001 |
| Body and tail                       | 188 (67%)                                    | 58 (51%)                                     | 62 (49%)                                          | 17 (40%)                                        |         |
| Diffuse                             | 1 (<1%)                                      | 0 (0%)                                       | 2 (2%)                                            | 0 (0%)                                          |         |
| WHO grade                           |                                              |                                              |                                                   |                                                 |         |
| Low (G1)                            | 175 (63%)                                    | 82 (73%)                                     | 81 (64%)                                          | 24 (57%)                                        | 0.003   |
| Intermediate (G2)                   | 101 (36%)                                    | 30 (26%)                                     | 45 (36%)                                          | 13 (31%)                                        |         |
| High (G3)                           | 4 (1%)                                       | 1 (1%)                                       | 0 (0%)                                            | 5 (12%)                                         |         |
| Lymphovascular invasion             | n = 227                                      | n = 91                                       | n = 72                                            | n = 34                                          |         |
| Absent                              | 148 (65%)                                    | 60 (66%)                                     | 51 (71%)                                          | 23 (68%)                                        | 0.865   |
| Present                             | 79 (35%)                                     | 31 (34%)                                     | 21 (29%)                                          | 11 (32%)                                        |         |
| Perineural invasion                 | n = 227                                      | n = 91                                       | n = 72                                            | n = 34                                          |         |
| Absent                              | 188 (83%)                                    | 69 (76%)                                     | 60 (83%)                                          | 24 (71%)                                        | 0.208   |
| Present                             | 39 (17%)                                     | 22 (24%)                                     | 12 (17%)                                          | 10 (29%)                                        |         |
| Primary tumor (pT) stage            |                                              |                                              |                                                   |                                                 |         |
| T1                                  | 88 (31%)                                     | 47 (42%)                                     | 32 (25%)                                          | 12 (29%)                                        | 0.065   |
| T2                                  | 106 (38%)                                    | 41 (36%)                                     | 62 (49%)                                          | 19 (45%)                                        |         |
| T3                                  | 81 (29%)                                     | 25 (22%)                                     | 30 (24%)                                          | 11 (26%)                                        |         |
| T4                                  | 5 (2%)                                       | 0 (0%)                                       | 2 (2%)                                            | 0 (0%)                                          |         |
| Regional node (pN) stage            | n = 250                                      | n = 95                                       | n = 118                                           | n = 39                                          |         |
| N0                                  | 193 (77%)                                    | 62 (65%)                                     | 84 (71%)                                          | 23 (59%)                                        | 0.031   |
| N1                                  | 57 (23%)                                     | 33 (35%)                                     | 34 (29%)                                          | 16 (41%)                                        |         |
| Metachronous metastases/recurrences |                                              |                                              |                                                   |                                                 |         |
| Absent                              | 205 (73%)                                    | 96 (85%)                                     | 93 (74%)                                          | 29 (69%)                                        | 0.048   |
| Present                             | 75 (27%)                                     | 17 (15%)                                     | 33 (26%)                                          | 13 (31%)                                        |         |
| ATRX/DAXX Expression                |                                              |                                              |                                                   |                                                 |         |
| Preserved                           | 187 (67%)                                    | 101 (89%)                                    | 96 (76%)                                          | 35 (83%)                                        | < 0.001 |
| Loss                                | 93 (33%)                                     | 12 (11%)                                     | 30 (24%)                                          | 7 (17%)                                         |         |
| ALT status                          |                                              |                                              |                                                   |                                                 |         |
| Negative                            | 171 (61%)                                    | 101 (89%)                                    | 93 (74%)                                          | 36 (86%)                                        | < 0.001 |
| Positive                            | 109 (39%)                                    | 12 (11%)                                     | 33 (26%)                                          | 6 (14%)                                         |         |

Abbreviations: ALT, alternative lengthening of telomeres; DN, double negative for ARX and PDX1; DP, double positive for ARX and PDX1; NF-PanNET, non-functional pancreatic neuroendocrine tumor; WHO, World Health Organization

**Supplementary Table 5. Clinical and pathologic comparison of primary NF-PanNETs based on the status of ARX<sup>+</sup>/DN, PDX1<sup>+</sup>/DP and ATRX/DAXX.**

| Patient or Tumor Characteristics            | ARX <sup>+</sup> + DN,<br>n = 322 (57%) | PDX1 <sup>+</sup> + DP,<br>n = 239 (43%) | <i>p</i> | Loss of ATRX/DAXX,<br>n = 142 (25%) | Preserved ATRX/DAXX,<br>n = 419 (75%) | <i>p</i> |
|---------------------------------------------|-----------------------------------------|------------------------------------------|----------|-------------------------------------|---------------------------------------|----------|
| Gender                                      |                                         |                                          |          |                                     |                                       |          |
| Female                                      | 144 (45%)                               | 131 (55%)                                | 0.021    | 58 (41%)                            | 217 (52%)                             | 0.026    |
| Male                                        | 178 (55%)                               | 108 (45%)                                |          | 84 (59%)                            | 202 (48%)                             |          |
| Mean age (range), years                     | 57.4 (22 - 85)                          | 56.2 (20 - 93)                           | 0.223    | 58.6 (26 - 93)                      | 56.3 (20 - 85)                        | 0.135    |
| Mean tumor size (range), cm                 | 3.5 (0.7 - 15.5)                        | 3.0 (0.6 - 18.0)                         | 0.063    | 4.8 (0.9 - 18.0)                    | 2.8 (0.6 - 10.0)                      | < 0.001  |
| Location                                    |                                         |                                          |          |                                     |                                       |          |
| Head, neck and uncinata                     | 116 (36%)                               | 117 (49%)                                | 0.002    | 50 (35%)                            | 183 (44%)                             | 0.133    |
| Body and tail                               | 205 (64%)                               | 120 (49%)                                |          | 91 (64%)                            | 234 (56%)                             |          |
| Diffuse                                     | 1 (< 1%)                                | 2 (1%)                                   |          | 1 (1%)                              | 2 (< 1%)                              |          |
| WHO grade                                   |                                         |                                          |          |                                     |                                       |          |
| Low (G1)                                    | 199 (62%)                               | 163 (68%)                                | 0.050    | 55 (39%)                            | 307 (73%)                             | < 0.001  |
| Intermediate (G2)                           | 114 (35%)                               | 75 (32%)                                 |          | 84 (59%)                            | 105 (25%)                             |          |
| High (G3)                                   | 9 (3%)                                  | 1 (< 1%)                                 |          | 3 (2%)                              | 7 (2%)                                |          |
| Lymphovascular invasion                     | <i>n</i> = 261                          | <i>n</i> = 163                           |          | <i>n</i> = 102                      | <i>n</i> = 322                        |          |
| Absent                                      | 171 (66%)                               | 111 (68%)                                | 0.599    | 37 (36%)                            | 245 (76%)                             | < 0.001  |
| Present                                     | 90 (34%)                                | 52 (32%)                                 |          | 65 (64%)                            | 77 (24%)                              |          |
| Perineural invasion                         | <i>n</i> = 261                          | <i>n</i> = 163                           |          | <i>n</i> = 102                      | <i>n</i> = 322                        |          |
| Absent                                      | 212 (81%)                               | 129 (79%)                                | 0.616    | 66 (65%)                            | 275 (85%)                             | < 0.001  |
| Present                                     | 49 (19%)                                | 34 (21%)                                 |          | 36 (35%)                            | 47 (15%)                              |          |
| Primary tumor (pT) stage                    |                                         |                                          |          |                                     |                                       |          |
| T1                                          | 100 (31%)                               | 79 (33%)                                 | 0.404    | 8 (6%)                              | 171 (41%)                             | < 0.001  |
| T2                                          | 125 (39%)                               | 103 (43%)                                |          | 63 (44%)                            | 165 (39%)                             |          |
| T3                                          | 92 (28%)                                | 55 (23%)                                 |          | 67 (47%)                            | 80 (19%)                              |          |
| T4                                          | 5 (2%)                                  | 2 (1%)                                   |          | 4 (3%)                              | 3 (1%)                                |          |
| Regional node (pN) stage                    | <i>n</i> = 289                          | <i>n</i> = 213                           |          | <i>n</i> = 139                      | <i>n</i> = 363                        |          |
| N0                                          | 216 (75%)                               | 146 (69%)                                | 0.132    | 77 (55%)                            | 285 (79%)                             | < 0.001  |
| N1                                          | 73 (25%)                                | 67 (31%)                                 |          | 62 (45%)                            | 78 (21%)                              |          |
| Metachronous distant metastases/recurrences |                                         |                                          |          |                                     |                                       |          |
| Absent                                      | 234 (74%)                               | 189 (79%)                                | 0.092    | 61 (43%)                            | 362 (86%)                             | < 0.001  |
| Present                                     | 88 (26%)                                | 50 (21%)                                 |          | 81 (57%)                            | 57 (14%)                              |          |
| ARX expression                              |                                         |                                          |          |                                     |                                       |          |
| Negative                                    | 42 (13%)                                | 113 (47%)                                | < 0.001  | 19 (13%)                            | 136 (32%)                             | < 0.001  |
| Positive                                    | 280 (87%)                               | 126 (53%)                                |          | 123 (87%)                           | 283 (68%)                             |          |
| PDX1 expression                             |                                         |                                          |          |                                     |                                       |          |
| Negative                                    | 322 (100%)                              | 0 (0%)                                   | < 0.001  | 100 (70%)                           | 222 (53%)                             | < 0.001  |
| Positive                                    | 0 (0%)                                  | 239 (100%)                               |          | 42 (30%)                            | 197 (47%)                             |          |
| ATRX/DAXX expression                        |                                         |                                          |          |                                     |                                       |          |
| Preserved                                   | 222 (69%)                               | 197 (82%)                                | < 0.001  |                                     |                                       |          |
| Loss                                        | 100 (31%)                               | 42 (18%)                                 |          |                                     |                                       |          |
| ALT status                                  |                                         |                                          |          |                                     |                                       |          |
| Negative                                    | 207 (64%)                               | 194 (81%)                                | < 0.001  | 10 (7%)                             | 391 (93%)                             | < 0.001  |
| Positive                                    | 115 (36%)                               | 45 (19%)                                 |          | 132 (93%)                           | 28 (7%)                               |          |

Abbreviations: ALT, alternative lengthening of telomeres; DN, double negative for ARX and PDX1; DP, double positive for ARX and PDX1; NF-PanNET, non-functional pancreatic neuroendocrine tumor; WHO, World Health Organization

**Supplementary Table 6. Clinical and pathologic comparison of ATRX and DAXX status in 561 non-syndromic, primary NF-PanNETs.**

| Patient or Tumor Characteristics           | Total, n = 561              | Loss of ATRX,<br>n = 70 (12%) | Preserved ATRX,<br>n = 491 (88%) | <i>P</i> | Loss of DAXX,<br>n = 87 (16%) | Preserved DAXX,<br>n = 474 (84%) | <i>P</i> |
|--------------------------------------------|-----------------------------|-------------------------------|----------------------------------|----------|-------------------------------|----------------------------------|----------|
| <b>Gender</b>                              |                             |                               |                                  |          |                               |                                  |          |
| Female                                     | 275 (49%)                   | 27 (39%)                      | 248 (50%)                        | 0.073    | 39 (45%)                      | 236 (50%)                        | 0.416    |
| Male                                       | 286 (51%)                   | 43 (61%)                      | 243 (50%)                        |          | 48 (55%)                      | 238 (50%)                        |          |
| Mean age (range), years                    | 56.9 (20 - 93)              | 56.8 (29 - 93)                | 56.9 (20 - 85)                   | 0.604    | 59.7 (26 - 82)                | 56.4 (20 - 93)                   | 0.025    |
| Mean tumor size (range), cm                | 3.3 (0.6 - 18.0)            | 4.9 (1.1 - 15.5)              | 3.0 (0.6 - 18.0)                 | < 0.001  | 4.7 (0.9 - 18.0)              | 3.0 (0.6 - 15.5)                 | < 0.001  |
| <b>Location</b>                            |                             |                               |                                  |          |                               |                                  |          |
| Head, neck and uncinate                    | 233 (41%)                   | 28 (40%)                      | 205 (42%)                        | 0.864    | 30 (35%)                      | 203 (43%)                        | 0.174    |
| Body and tail                              | 325 (58%)                   | 42 (60%)                      | 283 (57%)                        |          | 56 (64%)                      | 269 (56%)                        |          |
| Diffuse                                    | 3 (1%)                      | 0 (0%)                        | 3 (1%)                           |          | 1 (1%)                        | 2 (1%)                           |          |
| <b>WHO grade</b>                           |                             |                               |                                  |          |                               |                                  |          |
| Low (G1)                                   | 362 (65%)                   | 21 (30%)                      | 341 (69%)                        | < 0.001  | 38 (44%)                      | 324 (68%)                        | < 0.001  |
| Intermediate (G2)                          | 189 (33%)                   | 47 (67%)                      | 142 (29%)                        |          | 47 (54%)                      | 142 (30%)                        |          |
| High (G3)                                  | 10 (2%)                     | 2 (3%)                        | 8 (2%)                           |          | 2 (2%)                        | 8 (2%)                           |          |
| <b>Lymphovascular invasion</b>             |                             |                               |                                  |          |                               |                                  |          |
| Absent                                     | <i>n</i> = 424<br>282 (67%) | <i>n</i> = 51<br>18 (35%)     | <i>n</i> = 373<br>264 (71%)      | < 0.001  | <i>n</i> = 62<br>23 (37%)     | <i>n</i> = 362<br>259 (72%)      | < 0.001  |
| Present                                    | 142 (33%)                   | 33 (65%)                      | 109 (29%)                        |          | 39 (63%)                      | 103 (28%)                        |          |
| <b>Perineural invasion</b>                 |                             |                               |                                  |          |                               |                                  |          |
| Absent                                     | <i>n</i> = 424<br>341 (80%) | <i>n</i> = 51<br>33 (65%)     | <i>n</i> = 373<br>308 (83%)      | 0.004    | <i>n</i> = 62<br>41 (66%)     | <i>n</i> = 362<br>300 (83%)      | 0.005    |
| Present                                    | 83 (20%)                    | 18 (35%)                      | 65 (17%)                         |          | 21 (34%)                      | 62 (17%)                         |          |
| <b>Primary tumor (pT) stage</b>            |                             |                               |                                  |          |                               |                                  |          |
| T1                                         | 179 (32%)                   | 4 (6%)                        | 175 (36%)                        | < 0.001  | 4 (5%)                        | 175 (37%)                        | < 0.001  |
| T2                                         | 228 (41%)                   | 30 (43%)                      | 198 (40%)                        |          | 42 (48%)                      | 186 (39%)                        |          |
| T3                                         | 147 (26%)                   | 34 (48%)                      | 113 (23%)                        |          | 39 (45%)                      | 108 (23%)                        |          |
| T4                                         | 7 (1%)                      | 2 (3%)                        | 5 (1%)                           |          | 2 (2%)                        | 5 (1%)                           |          |
| <b>Regional node (pN) stage</b>            |                             |                               |                                  |          |                               |                                  |          |
| N0                                         | <i>n</i> = 502<br>362 (72%) | <i>n</i> = 68<br>40 (59%)     | <i>n</i> = 434<br>322 (74%)      | 0.013    | <i>n</i> = 86<br>48 (56%)     | <i>n</i> = 416<br>314 (76%)      | < 0.001  |
| N1                                         | 140 (28%)                   | 28 (41%)                      | 112 (26%)                        |          | 38 (44%)                      | 102 (24%)                        |          |
| <b>Metachronous metastases/recurrences</b> |                             |                               |                                  |          |                               |                                  |          |
| Absent                                     | 423 (75%)                   | 30 (43%)                      | 393 (80%)                        | < 0.001  | 38 (44%)                      | 385 (81%)                        | < 0.001  |
| Present                                    | 138 (25%)                   | 40 (57%)                      | 98 (20%)                         |          | 49 (56%)                      | 89 (19%)                         |          |
| <b>ARX Expression</b>                      |                             |                               |                                  |          |                               |                                  |          |
| Negative                                   | 155 (28%)                   | 10 (14%)                      | 145 (30%)                        | 0.007    | 12 (14%)                      | 143 (30%)                        | 0.002    |
| Positive                                   | 406 (72%)                   | 60 (86%)                      | 346 (70%)                        |          | 75 (86%)                      | 331 (70%)                        |          |
| <b>PDX1 Expression</b>                     |                             |                               |                                  |          |                               |                                  |          |
| Negative                                   | 322 (57%)                   | 53 (76%)                      | 269 (55%)                        | 0.001    | 59 (68%)                      | 263 (56%)                        | 0.034    |
| Positive                                   | 239 (43%)                   | 17 (24%)                      | 222 (45%)                        |          | 28 (32%)                      | 211 (44%)                        |          |
| <b>ATRX Expression</b>                     |                             |                               |                                  |          |                               |                                  |          |
| Preserved                                  | 491 (88%)                   |                               |                                  |          | 73 (84%)                      | 418 (88%)                        | 0.289    |
| Loss                                       | 70 (12%)                    |                               |                                  |          | 14 (16%)                      | 56 (12%)                         |          |
| <b>DAXX Expression</b>                     |                             |                               |                                  |          |                               |                                  |          |
| Preserved                                  | 474 (84%)                   | 56 (80%)                      | 418 (85%)                        | 0.289    |                               |                                  |          |
| Loss                                       | 87 (16%)                    | 14 (20%)                      | 73 (15%)                         |          |                               |                                  |          |
| <b>ALT status</b>                          |                             |                               |                                  |          |                               |                                  |          |
| Negative                                   | 401 (71%)                   | 4 (6%)                        | 397 (81%)                        | < 0.001  | 7 (8%)                        | 394 (83%)                        | < 0.001  |
| Positive                                   | 160 (29%)                   | 66 (94%)                      | 97 (19%)                         |          | 80 (92%)                      | 80 (17%)                         |          |

Abbreviations: ALT, alternative lengthening of telomeres; NF-PanNET, non-functional pancreatic neuroendocrine tumor; WHO, World Health Organization

**Supplementary Table 7. Clinical and pathologic comparison of ARX, PDX1 and ALT status in 196 primary NF-PanNETs of ≤2.0 cm and without lymph node metastases.**

| Patient or Tumor Characteristics           | Total, n = 196  | ARX-positive, n = 133 (68%) | ARX-negative, n = 63 (32%) | P       | PDX1-positive, n = 87 (44%) | PDX1-negative, n = 109 (56%) | P       | ALT-positive, n = 17 (9%) | ALT-negative, n = 179 (91%) | P       |
|--------------------------------------------|-----------------|-----------------------------|----------------------------|---------|-----------------------------|------------------------------|---------|---------------------------|-----------------------------|---------|
| <b>Gender</b>                              |                 |                             |                            |         |                             |                              |         |                           |                             |         |
| Female                                     | 104 (53%)       | 64 (48%)                    | 40 (63%)                   | 0.048   | 57 (66%)                    | 47 (43%)                     | 0.002   | 9 (53%)                   | 95 (53%)                    | 1.000   |
| Male                                       | 92 (47%)        | 69 (52%)                    | 23 (37%)                   |         | 30 (34%)                    | 62 (57%)                     |         | 8 (47%)                   | 84 (47%)                    |         |
| Mean age (range), years                    | 57.1 (23 - 83)  | 57.1 (23 - 82)              | 57.3 (35 - 83)             | 0.931   | 56.8 (23 - 83)              | 57.4 (27 - 82)               | 0.688   | 52.9 (41 - 64)            | 57.5 (23 - 83)              | 0.066   |
| Mean tumor size (range), cm                | 1.4 (0.6 - 2.0) | 1.4 (0.7 - 2.0)             | 1.4 (0.6 - 2.0)            | 0.774   | 1.4 (0.6 - 2.0)             | 1.4 (0.7 - 2.0)              | 0.253   | 1.6 (0.7 - 2.0)           | 1.4 (0.6 - 2.0)             | 0.011   |
| <b>Location</b>                            |                 |                             |                            |         |                             |                              |         |                           |                             |         |
| Head, neck and uncinate                    | 68 (35%)        | 45 (34%)                    | 23 (37%)                   | 0.749   | 37 (43%)                    | 31 (28%)                     | 0.050   | 7 (41%)                   | 61 (34%)                    | 0.599   |
| Body and tail                              | 128 (65%)       | 88 (66%)                    | 40 (63%)                   |         | 50 (57%)                    | 78 (72%)                     |         | 10 (59%)                  | 118 (66%)                   |         |
| <b>WHO grade</b>                           |                 |                             |                            |         |                             |                              |         |                           |                             |         |
| Low (G1)                                   | 162 (83%)       | 110 (83%)                   | 52 (83%)                   | 1.000   | 70 (80%)                    | 92 (84%)                     | 0.570   | 8 (47%)                   | 154 (86%)                   | < 0.001 |
| Intermediate (G2)                          | 34 (17%)        | 23 (17%)                    | 11 (17%)                   |         | 17 (20%)                    | 17 (16%)                     |         | 9 (53%)                   | 25 (14%)                    |         |
| <b>Lymphovascular invasion</b>             |                 |                             |                            |         |                             |                              |         |                           |                             |         |
| Absent                                     | 148 (93%)       | 93 (89%)                    | 55 (100%)                  | 0.017   | 62 (93%)                    | 86 (93%)                     | 1.000   | 7 (64%)                   | 141 (95%)                   | 0.003   |
| Present                                    | 11 (7%)         | 11 (11%)                    | 0 (0%)                     |         | 5 (7%)                      | 6 (7%)                       |         | 4 (36%)                   | 7 (5%)                      |         |
| <b>Perineural invasion</b>                 |                 |                             |                            |         |                             |                              |         |                           |                             |         |
| Absent                                     | 146 (92%)       | 95 (91%)                    | 51 (93%)                   | 1.000   | 62 (93%)                    | 84 (91%)                     | 1.000   | 10 (91%)                  | 136 (92%)                   | 1.000   |
| Present                                    | 13 (8%)         | 9 (9%)                      | 4 (7%)                     |         | 5 (7%)                      | 8 (9%)                       |         | 1 (9%)                    | 12 (8%)                     |         |
| <b>Metachronous metastases/recurrences</b> |                 |                             |                            |         |                             |                              |         |                           |                             |         |
| Absent                                     | 178 (91%)       | 118 (89%)                   | 60 (95%)                   | 0.188   | 79 (91%)                    | 99 (91%)                     | 1.000   | 10 (59%)                  | 168 (94%)                   | < 0.001 |
| Present                                    | 18 (9%)         | 15 (11%)                    | 3 (5%)                     |         | 8 (9%)                      | 10 (9%)                      |         | 7 (41%)                   | 11 (6%)                     |         |
| <b>ARX Expression</b>                      |                 |                             |                            |         |                             |                              |         |                           |                             |         |
| Negative                                   | 63 (32%)        |                             |                            |         | 47 (54%)                    | 16 (15%)                     | < 0.001 | 1 (6%)                    | 62 (35%)                    | 0.014   |
| Positive                                   | 133 (68%)       |                             |                            |         | 40 (46%)                    | 93 (85%)                     |         | 16 (94%)                  | 117 (65%)                   |         |
| <b>PDX1 Expression</b>                     |                 |                             |                            |         |                             |                              |         |                           |                             |         |
| Negative                                   | 109 (56%)       | 93 (70%)                    | 16 (25%)                   | < 0.001 |                             |                              |         | 12 (71%)                  | 97 (54%)                    | 0.214   |
| Positive                                   | 87 (44%)        | 40 (30%)                    | 47 (75%)                   |         |                             |                              |         | 5 (29%)                   | 82 (46%)                    |         |
| <b>ATRX/DAXX Expression</b>                |                 |                             |                            |         |                             |                              |         |                           |                             |         |
| Preserved                                  | 183 (93%)       | 121 (91%)                   | 62 (98%)                   | 0.065   | 82 (94%)                    | 101 (93%)                    | 0.777   | 5 (29%)                   | 178 (99%)                   | < 0.001 |
| Loss                                       | 13 (7%)         | 12 (9%)                     | 1 (2%)                     |         | 5 (6%)                      | 8 (7%)                       |         | 12 (71%)                  | 1 (1%)                      |         |
| <b>ALT status</b>                          |                 |                             |                            |         |                             |                              |         |                           |                             |         |
| Negative                                   | 179 (91%)       | 117 (88%)                   | 62 (98%)                   | 0.014   | 82 (94%)                    | 97 (89%)                     | 0.214   |                           |                             |         |
| Positive                                   | 17 (9%)         | 16 (12%)                    | 1 (2%)                     |         | 5 (6%)                      | 12 (11%)                     |         |                           |                             |         |

Abbreviations: ALT, alternative lengthening of telomeres; NF-PanNET, non-functional pancreatic neuroendocrine tumor; WHO, World Health Organization

**Supplementary Table 8. RFS rates based on tumor size thresholds for NF-PanNETs of  $\leq 2.0$  cm and without lymph node metastases.**

| Tumor size threshold | 1, 5 and 10-year RFS rates,<br>below and equal to ( $\leq$ ) tumor size threshold | 1, 5 and 10-year RFS rates,<br>above ( $>$ ) tumor size threshold | <i>p</i> |
|----------------------|-----------------------------------------------------------------------------------|-------------------------------------------------------------------|----------|
| 0.7 cm               | 92%, 92% and 92%                                                                  | 97%, 89% and 78%                                                  | 0.883    |
| 0.8 cm               | 95%, 95% and 95%                                                                  | 97%, 89% and 78%                                                  | 0.529    |
| 0.9 cm               | 96%, 96% and 96%                                                                  | 97%, 89% and 77%                                                  | 0.394    |
| 1.0 cm               | 98%, 98% and 98%                                                                  | 96%, 87% and 75%                                                  | 0.099    |
| 1.1 cm               | 98%, 94% and 94%                                                                  | 96%, 88% and 75%                                                  | 0.150    |
| 1.2 cm               | 99%, 95% and 95%                                                                  | 96%, 87% and 74%                                                  | 0.059    |
| 1.3 cm               | 97%, 95% and 95%                                                                  | 96%, 86% and 72%                                                  | 0.054    |
| 1.4 cm               | 97%, 95% and 95%                                                                  | 96%, 86% and 72%                                                  | 0.042    |
| 1.5 cm               | 97%, 91% and 91%                                                                  | 96%, 86% and 65%                                                  | 0.046    |
| 1.6 cm               | 98%, 92% and 92%                                                                  | 95%, 85% and 61%                                                  | 0.017    |
| 1.7 cm               | 97%, 90% and 90%                                                                  | 96%, 88% and 58%                                                  | 0.040    |
| 1.8 cm               | 97%, 89% and 89%                                                                  | 97%, 92% and 58%                                                  | 0.095    |
| 1.9 cm               | 97%, 89% and 89%                                                                  | 97%, 91% and 58%                                                  | 0.074    |

Abbreviations: *N/A*, not available; *NF-PanNET*, non-functional pancreatic neuroendocrine tumor; *RFS*, relapse-free survival



**Supplementary Table 9. Clinical and pathologic comparison of ARX, PDX1, ATRX/DAXX, and ALT status in 107 patients with NF-PanNET metastases.**

| Patient or Tumor Characteristics                | Total, n = 107   | ARX-positive, n = 85 (79%) | ARX-negative, n = 22 (21%) | <i>P</i> | PDX1-positive, n = 36 (34%) | PDX1-negative, n = 71 (66%) | <i>P</i> | Loss of ATRX/DAXX, n = 66 (62%) | Preserved ATRX/DAXX, n = 41 (38%) | <i>P</i> | ALT-positive, n = 76 (71%) | ALT-negative, n = 31 (29%) | <i>P</i> |
|-------------------------------------------------|------------------|----------------------------|----------------------------|----------|-----------------------------|-----------------------------|----------|---------------------------------|-----------------------------------|----------|----------------------------|----------------------------|----------|
| <b>Gender</b>                                   |                  |                            |                            |          |                             |                             |          |                                 |                                   |          |                            |                            |          |
| Female                                          | 53 (49%)         | 38 (45%)                   | 15 (68%)                   | 0.059    | 25 (69%)                    | 28 (39%)                    | 0.004    | 25 (38%)                        | 28 (68%)                          | 0.003    | 30 (39%)                   | 23 (74%)                   | 0.001    |
| Male                                            | 54 (51%)         | 47 (55%)                   | 7 (32%)                    |          | 11 (31%)                    | 43 (61%)                    |          | 41 (62%)                        | 13 (32%)                          |          | 46 (61%)                   | 8 (26%)                    |          |
| Mean age at initial presentation (range), years | 60.2 (31 - 85)   | 60.8 (32 - 85)             | 58.1 (31 - 78)             | 0.414    | 58.1 (31 - 85)              | 61.3 (36 - 83)              | 0.203    | 61.3 (31 - 85)                  | 58.6 (31 - 82)                    | 0.290    | 60.6 (31 - 85)             | 59.3 (31 - 82)             | 0.734    |
| Mean primary tumor size (range), cm             | 5.3 (1.0 - 18.0) | 5.6 (1.5 - 18.0)           | 4.2 (1.0 - 8.0)            | 0.179    | 4.5 (1.0 - 10.0)            | 5.8 (1.5 - 18.0)            | 0.289    | 5.4 (1.0 - 15.0)                | 5.3 (2.4 - 18.0)                  | 0.707    | 5.6 (1.0 - 18.0)           | 4.7 (2.4 - 17.0)           | 0.197    |
| <b>Primary tumor location</b>                   |                  |                            |                            |          |                             |                             |          |                                 |                                   |          |                            |                            |          |
| Head, neck and uncinate                         | 43 (40%)         | 31 (36%)                   | 12 (55%)                   | 0.147    | 20 (56%)                    | 23 (32%)                    | 0.024    | 19 (29%)                        | 24 (59%)                          | 0.004    | 24 (32%)                   | 19 (61%)                   | 0.008    |
| Body and tail                                   | 64 (60%)         | 54 (64%)                   | 10 (45%)                   |          | 16 (44%)                    | 48 (67%)                    |          | 47 (71%)                        | 17 (41%)                          |          | 52 (68%)                   | 12 (39%)                   |          |
| <b>Primary tumor, WHO grade</b>                 |                  |                            |                            |          |                             |                             |          |                                 |                                   |          |                            |                            |          |
| Low (G1)                                        | 29 (27%)         | 20 (24%)                   | 9 (41%)                    | 0.024    | 11 (31%)                    | 18 (25%)                    | 0.145    | 17 (26%)                        | 12 (29%)                          | 0.942    | 20 (26%)                   | 9 (29%)                    | 0.878    |
| Intermediate (G2)                               | 72 (67%)         | 62 (73%)                   | 10 (45%)                   |          | 21 (58%)                    | 51 (72%)                    |          | 45 (68%)                        | 27 (66%)                          |          | 51 (67%)                   | 21 (68%)                   |          |
| High (G3)                                       | 6 (6%)           | 3 (3%)                     | 3 (14%)                    |          | 4 (11%)                     | 2 (2%)                      |          | 4 (6%)                          | 2 (5%)                            |          | 5 (7%)                     | 1 (3%)                     |          |
| <b>Metastatic tumor(s), highest WHO grade</b>   |                  |                            |                            |          |                             |                             |          |                                 |                                   |          |                            |                            |          |
| Low (G1)                                        | 20 (19%)         | 14 (16%)                   | 6 (27%)                    | 0.177    | 8 (22%)                     | 12 (17%)                    | 0.362    | 9 (14%)                         | 11 (27%)                          | 0.234    | 11 (14%)                   | 9 (29%)                    | 0.225    |
| Intermediate (G2)                               | 79 (74%)         | 66 (78%)                   | 13 (59%)                   |          | 24 (67%)                    | 55 (77%)                    |          | 52 (79%)                        | 27 (66%)                          |          | 59 (78%)                   | 20 (65%)                   |          |
| High (G3)                                       | 8 (7%)           | 5 (6%)                     | 3 (14%)                    |          | 4 (11%)                     | 4 (6%)                      |          | 3 (7%)                          | 3 (7%)                            |          | 6 (8%)                     | 2 (6%)                     |          |
| <b>ARX expression</b>                           |                  |                            |                            |          |                             |                             |          |                                 |                                   |          |                            |                            |          |
| Negative                                        | 22 (21%)         |                            |                            |          | 22 (61%)                    | 0 (0%)                      | < 0.001  | 8 (12%)                         | 14 (34%)                          | 0.013    | 9 (12%)                    | 13 (42%)                   | 0.001    |
| Positive                                        | 85 (79%)         |                            |                            |          | 14 (39%)                    | 71 (100%)                   |          | 58 (88%)                        | 27 (66%)                          |          | 67 (88%)                   | 18 (58%)                   |          |
| <b>PDX1 expression</b>                          |                  |                            |                            |          |                             |                             |          |                                 |                                   |          |                            |                            |          |
| Negative                                        | 71 (66%)         | 71 (84%)                   | 0 (0%)                     | < 0.001  |                             |                             |          | 54 (82%)                        | 17 (42%)                          | < 0.001  | 62 (82%)                   | 9 (29%)                    | < 0.001  |
| Positive                                        | 36 (34%)         | 14 (16%)                   | 22 (100%)                  |          |                             |                             |          | 12 (18%)                        | 24 (58%)                          |          | 14 (18%)                   | 22 (71%)                   |          |
| <b>ATRX/DAXX expression</b>                     |                  |                            |                            |          |                             |                             |          |                                 |                                   |          |                            |                            |          |
| Preserved                                       | 41 (38%)         | 27 (32%)                   | 14 (64%)                   | 0.013    | 24 (67%)                    | 17 (24%)                    | < 0.001  |                                 |                                   |          | 10 (13%)                   | 31 (100%)                  | < 0.001  |
| Loss                                            | 66 (62%)         | 58 (68%)                   | 8 (36%)                    |          | 12 (33%)                    | 54 (76%)                    |          |                                 |                                   |          | 66 (87%)                   | 0 (0%)                     |          |
| <b>ALT status</b>                               |                  |                            |                            |          |                             |                             |          |                                 |                                   |          |                            |                            |          |
| Negative                                        | 31 (29%)         | 18 (21%)                   | 13 (59%)                   | 0.001    | 22 (61%)                    | 9 (13%)                     | < 0.001  | 0 (0%)                          | 31 (76%)                          | < 0.001  |                            |                            |          |
| Positive                                        | 76 (71%)         | 67 (79%)                   | 9 (41%)                    |          | 14 (39%)                    | 62 (87%)                    |          | 66 (100%)                       | 10 (24%)                          |          |                            |                            |          |
| <b>Timing of metastatic tumor(s)</b>            |                  |                            |                            |          |                             |                             |          |                                 |                                   |          |                            |                            |          |
| Synchronous                                     | 14 (13%)         | 10 (12%)                   | 4 (18%)                    | 0.567    | 6 (17%)                     | 8 (11%)                     | 0.610    | 6 (9%)                          | 8 (20%)                           | 0.138    | 6 (8%)                     | 8 (26%)                    | 0.038    |
| Metachronous                                    | 48 (45%)         | 40 (47%)                   | 8 (36%)                    |          | 14 (39%)                    | 34 (48%)                    |          | 34 (52%)                        | 14 (34%)                          |          | 38 (50%)                   | 10 (32%)                   |          |
| Both                                            | 45 (42%)         | 35 (41%)                   | 10 (46%)                   |          | 16 (44%)                    | 29 (41%)                    |          | 26 (39%)                        | 19 (46%)                          |          | 32 (42%)                   | 13 (42%)                   |          |

Abbreviations: ALT, alternative lengthening of telomeres; NF-PanNET, non-functional pancreatic neuroendocrine tumor; WHO, World Health Organization

Supplementary Table 10. Clinical and pathologic comparison of ARX and PDX1 among primary gastric, duodenal, rectal and appendiceal NETs.

| Patient or Tumor Characteristics    | Gastric NETs (n = 32)      |                           |       |                            |                             | Duodenal NETs (n = 41) |                            |                            |       |                             | Rectal NETs (n = 17)       |       |                             |                          |          | Appendiceal NETs (n = 28) |                             |                 |                             |                          |                 |                           |                             |   |  |
|-------------------------------------|----------------------------|---------------------------|-------|----------------------------|-----------------------------|------------------------|----------------------------|----------------------------|-------|-----------------------------|----------------------------|-------|-----------------------------|--------------------------|----------|---------------------------|-----------------------------|-----------------|-----------------------------|--------------------------|-----------------|---------------------------|-----------------------------|---|--|
|                                     | ARX-positive, n = 28 (88%) | ARX-negative, n = 4 (12%) | p     | PDX1-positive, n = 4 (12%) | PDX1-negative, n = 28 (88%) | p                      | ARX-positive, n = 24 (59%) | ARX-negative, n = 17 (41%) | p     | PDX1-positive, n = 36 (88%) | PDX1-negative, n = 5 (12%) | p     | ARX-positive, n = 17 (100%) | ARX-negative, n = 0 (0%) | p        | PDX1-positive, n = 1 (6%) | PDX1-negative, n = 16 (94%) | p               | ARX-positive, n = 28 (100%) | ARX-negative, n = 0 (0%) | p               | PDX1-positive, n = 2 (7%) | PDX1-negative, n = 26 (93%) | p |  |
| Gender                              |                            |                           |       |                            |                             |                        |                            |                            |       |                             |                            |       |                             |                          |          |                           |                             |                 |                             |                          |                 |                           |                             |   |  |
| Female                              | 14 (50%)                   | 1 (25%)                   | 0.603 | 2 (50%)                    | 13 (46%)                    | 1.000                  | 11 (46%)                   | 10 (59%)                   | 0.530 | 21 (58%)                    | 0 (0%)                     | 0.021 | 10 (59%)                    | N/A                      | 0 (0%)   | 10 (63%)                  | 0.412                       | 16 (57%)        | N/A                         | 2 (100%)                 | 14 (54%)        | 0.492                     |                             |   |  |
| Male                                | 15 (50%)                   | 3 (75%)                   |       | 2 (50%)                    | 15 (54%)                    |                        | 13 (54%)                   | 7 (41%)                    |       | 15 (42%)                    | 5 (100%)                   |       | 7 (41%)                     | 1 (100%)                 |          | 6 (37%)                   |                             | 12 (43%)        |                             | 0 (0%)                   | 12 (46%)        |                           |                             |   |  |
| Mean age (range), years             | 57.4 (35 - 82)             | 45.8 (17 - 62)            | 0.392 | 46.0 (17 - 62)             | 57.3 (35 - 82)              | 0.424                  | 59.5 (36 - 78)             | 55.2 (29 - 75)             | 0.327 | 59.3 (29 - 78)              | 46.8 (36 - 59)             | 0.030 | 50.2 (25 - 75)              | N/A                      | 49.0     | 50.3 (25 - 75)            | 0.941                       | 46.0 (17 - 87)  | N/A                         | 42.5 (38 - 47)           | 46.2 (17 - 87)  | 1.000                     |                             |   |  |
| Mean tumor size (range), cm         | 1.6 (0.3 - 3.0)            | 1.7 (1.2 - 2.3)           | 0.721 | 1.5 (1.0 - 2.3)            | 1.6 (0.3 - 3.0)             | 0.891                  | 1.5 (0.3 - 4.5)            | 1.4 (0.3 - 4.5)            | 0.605 | 1.5 (0.3 - 4.5)             | 1.2 (1.0 - 1.8)            | 0.632 | 2.2 (0.3 - 7.0)             | N/A                      | 0.5      | 2.3 (0.4 - 7.0)           | 0.353                       | 1.1 (0.2 - 3.5) | N/A                         | 0.5 (0.5 - 0.5)          | 1.2 (0.2 - 3.5) | 0.190                     |                             |   |  |
| WHO grade                           |                            |                           |       |                            |                             |                        |                            |                            |       |                             |                            |       |                             |                          |          |                           |                             |                 |                             |                          |                 |                           |                             |   |  |
| Low (G1)                            | 20 (72%)                   | 2 (50%)                   | 0.454 | 2 (50%)                    | 20 (72%)                    | 0.454                  | 21 (88%)                   | 11 (65%)                   | 0.158 | 29 (80%)                    | 3 (60%)                    | 0.347 | 11 (65%)                    | N/A                      | 1 (100%) | 10 (63%)                  | 1.000                       | 27 (96%)        | N/A                         | 2 (100%)                 | 25 (96%)        | 1.000                     |                             |   |  |
| Intermediate (G2)                   | 6 (21%)                    | 2 (50%)                   |       | 2 (50%)                    | 6 (21%)                     |                        | 3 (12%)                    | 5 (29%)                    |       | 6 (17%)                     | 2 (40%)                    |       | 6 (35%)                     | 0 (0%)                   |          | 6 (37%)                   |                             | 1 (4%)          |                             | 0 (0%)                   | 1 (4%)          |                           |                             |   |  |
| High (G3)                           | 2 (7%)                     | 0 (0%)                    |       | 0 (0%)                     | 2 (7%)                      |                        | 0 (0%)                     | 1 (6%)                     |       | 1 (3%)                      | 0 (0%)                     |       | 0 (0%)                      | 0 (0%)                   |          | 0 (0%)                    |                             | 0 (0%)          |                             | 0 (0%)                   | 0 (0%)          |                           |                             |   |  |
| Lymphovascular invasion             |                            |                           |       |                            |                             |                        |                            |                            |       |                             |                            |       |                             |                          |          |                           |                             |                 |                             |                          |                 |                           |                             |   |  |
| Absent                              | 23 (82%)                   | 3 (75%)                   | 1.000 | 3 (75%)                    | 23 (82%)                    | 1.000                  | 13 (54%)                   | 12 (71%)                   | 0.344 | 23 (64%)                    | 2 (40%)                    | 0.362 | 8 (47%)                     | N/A                      | 1 (100%) | 7 (44%)                   | 0.471                       | 27 (96%)        | N/A                         | 2 (100%)                 | 25 (96%)        | 1.000                     |                             |   |  |
| Present                             | 5 (18%)                    | 1 (25%)                   |       | 1 (25%)                    | 5 (18%)                     |                        | 11 (46%)                   | 5 (29%)                    |       | 13 (36%)                    | 3 (60%)                    |       | 9 (53%)                     | 0 (0%)                   |          | 9 (56%)                   |                             | 1 (4%)          |                             | 0 (0%)                   | 1 (4%)          |                           |                             |   |  |
| Peritoneal invasion                 |                            |                           |       |                            |                             |                        |                            |                            |       |                             |                            |       |                             |                          |          |                           |                             |                 |                             |                          |                 |                           |                             |   |  |
| Absent                              | 24 (86%)                   | 4 (100%)                  | 1.000 | 4 (100%)                   | 24 (86%)                    | 1.000                  | 22 (92%)                   | 14 (82%)                   | 0.633 | 33 (92%)                    | 3 (60%)                    | 0.104 | 11 (65%)                    | N/A                      | 1 (100%) | 10 (63%)                  | 1.000                       | 23 (82%)        | N/A                         | 2 (100%)                 | 21 (81%)        | 1.000                     |                             |   |  |
| Present                             | 4 (14%)                    | 0 (0%)                    |       | 0 (0%)                     | 4 (14%)                     |                        | 2 (8%)                     | 3 (18%)                    |       | 3 (8%)                      | 2 (40%)                    |       | 6 (35%)                     | 0 (0%)                   |          | 6 (37%)                   |                             | 5 (18%)         |                             | 0 (0%)                   | 5 (19%)         |                           |                             |   |  |
| Primary tumor (pT) stage            |                            |                           |       |                            |                             |                        |                            |                            |       |                             |                            |       |                             |                          |          |                           |                             |                 |                             |                          |                 |                           |                             |   |  |
| T1                                  | 12 (43%)                   | 0 (0%)                    | 0.138 | 1 (25%)                    | 11 (39%)                    | 0.632                  | 12 (50%)                   | 9 (53%)                    | 0.308 | 20 (55%)                    | 1 (20%)                    | 0.373 | 10 (59%)                    | N/A                      | 1 (100%) | 9 (56%)                   | 1.000                       | 23 (82%)        | N/A                         | 2 (100%)                 | 21 (81%)        | 1.000                     |                             |   |  |
| T2                                  | 11 (39%)                   | 4 (100%)                  |       | 3 (75%)                    | 12 (43%)                    |                        | 10 (42%)                   | 4 (23%)                    |       | 11 (31%)                    | 3 (60%)                    |       | 2 (12%)                     | 0 (0%)                   |          | 2 (13%)                   |                             | 0 (0%)          |                             | 0 (0%)                   | 0 (0%)          |                           |                             |   |  |
| T3                                  | 5 (18%)                    | 0 (0%)                    |       | 0 (0%)                     | 5 (18%)                     |                        | 2 (8%)                     | 3 (18%)                    |       | 4 (11%)                     | 1 (20%)                    |       | 5 (29%)                     | 0 (0%)                   |          | 5 (31%)                   |                             | 5 (18%)         |                             | 0 (0%)                   | 5 (19%)         |                           |                             |   |  |
| T4                                  | 0 (0%)                     | 0 (0%)                    |       | 0 (0%)                     | 0 (0%)                      |                        | 0 (0%)                     | 1 (6%)                     |       | 1 (3%)                      | 0 (0%)                     |       | 0 (0%)                      | 0 (0%)                   |          | 0 (0%)                    |                             | 0 (0%)          |                             | 0 (0%)                   | 0 (0%)          |                           |                             |   |  |
| Regional node (pN) stage            |                            |                           |       |                            |                             |                        |                            |                            |       |                             |                            |       |                             |                          |          |                           |                             |                 |                             |                          |                 |                           |                             |   |  |
| N0                                  | 24 (86%)                   | 3 (75%)                   | 0.512 | 3 (75%)                    | 24 (86%)                    | 0.512                  | 17 (71%)                   | 12 (71%)                   | 1.000 | 26 (72%)                    | 3 (60%)                    | 0.620 | 13 (77%)                    | N/A                      | 1 (100%) | 12 (75%)                  | 1.000                       | 26 (93%)        | N/A                         | 2 (100%)                 | 24 (92%)        | 1.000                     |                             |   |  |
| N1                                  | 4 (14%)                    | 1 (25%)                   |       | 1 (25%)                    | 4 (14%)                     |                        | 7 (29%)                    | 5 (29%)                    |       | 10 (28%)                    | 2 (40%)                    |       | 4 (23%)                     | 0 (0%)                   |          | 4 (25%)                   |                             | 2 (7%)          |                             | 0 (0%)                   | 2 (8%)          |                           |                             |   |  |
| Metachronous metastases/recurrences |                            |                           |       |                            |                             |                        |                            |                            |       |                             |                            |       |                             |                          |          |                           |                             |                 |                             |                          |                 |                           |                             |   |  |
| Absent                              | 22 (79%)                   | 4 (100%)                  | 0.566 | 4 (100%)                   | 22 (79%)                    | 0.566                  | 21 (88%)                   | 13 (77%)                   | 0.421 | 31 (86%)                    | 3 (60%)                    | 0.196 | 10 (59%)                    | N/A                      | 1 (100%) | 9 (56%)                   | 1.000                       | 28 (100%)       | N/A                         | 2 (100%)                 | 26 (100%)       | N/A                       |                             |   |  |
| Present                             | 6 (21%)                    | 0 (0%)                    |       | 0 (0%)                     | 6 (21%)                     |                        | 3 (12%)                    | 4 (23%)                    |       | 5 (14%)                     | 2 (40%)                    |       | 7 (41%)                     | 0 (0%)                   |          | 7 (44%)                   |                             | 0 (0%)          |                             | 0 (0%)                   | 0 (0%)          |                           |                             |   |  |
| ARX Expression                      |                            |                           |       |                            |                             |                        |                            |                            |       |                             |                            |       |                             |                          |          |                           |                             |                 |                             |                          |                 |                           |                             |   |  |
| Negative                            |                            | 2 (50%)                   |       | 2 (7%)                     | 0.066                       |                        |                            |                            |       | 15 (42%)                    | 2 (40%)                    | 1.000 |                             | 0 (0%)                   |          | 0 (0%)                    | N/A                         |                 |                             | 0 (0%)                   | 0 (0%)          | N/A                       |                             |   |  |
| Positive                            |                            | 2 (50%)                   |       | 26 (93%)                   |                             |                        |                            |                            |       | 21 (58%)                    | 3 (60%)                    |       |                             | 1 (100%)                 |          | 16 (100%)                 |                             |                 |                             | 2 (100%)                 | 26 (100%)       |                           |                             |   |  |
| PDX1 Expression                     |                            |                           |       |                            |                             |                        |                            |                            |       |                             |                            |       |                             |                          |          |                           |                             |                 |                             |                          |                 |                           |                             |   |  |
| Negative                            | 26 (93%)                   | 2 (50%)                   | 0.066 |                            |                             |                        | 3 (12%)                    | 2 (12%)                    | 1.000 |                             |                            |       | 16 (94%)                    | N/A                      |          |                           |                             | 26 (93%)        | N/A                         |                          |                 |                           |                             |   |  |
| Positive                            | 2 (7%)                     |                           |       |                            |                             |                        | 21 (88%)                   | 15 (88%)                   |       |                             |                            |       | 1 (6%)                      |                          |          |                           |                             | 2 (7%)          |                             |                          |                 |                           |                             |   |  |

Abbreviations: N/A, not applicable; NET, neuroendocrine tumor; WHO, World Health Organization
